# Supplementary material for: Solar Drinking Water Disinfection (SODIS) to Reduce Childhood Diarrhoea in Rural Bolivia: A Cluster-Randomized, Controlled Trial
Source: PLoS Med. 2009 Aug 18;6(8):e1000125. doi: 10.1371/journal.pmed.1000125 (PMC2719054; doi:10.1371/journal.pmed.1000125)
Supplement: Text S2 — CONSORT statement checklist. (0.10 MB PDF) [file pmed.1000125.s004.pdf]

# CONSORT Statement

## Checklist of items to include when reporting a cluster randomised trial (adaptations from standard guidelines in *italic*)

| <b>PAPER SECTION<br/>And topic</b>         | <b>Item</b> | <b>Descriptor</b>                                                                                                                                                                                                                                                                                                                                            | <b>Reported in<br/>section</b>                                                    |
|--------------------------------------------|-------------|--------------------------------------------------------------------------------------------------------------------------------------------------------------------------------------------------------------------------------------------------------------------------------------------------------------------------------------------------------------|-----------------------------------------------------------------------------------|
| <b>TITLE &amp; ABSTRACT</b>                | 1           | How participants were allocated to interventions (eg random allocation, randomised, or randomly assigned), <i>specifying that allocation was based on clusters.</i>                                                                                                                                                                                          | Title                                                                             |
| <b>INTRODUCTION</b><br>Background          | 2           | Scientific background and explanation of rationale, <i>including the rationale for using a cluster design</i>                                                                                                                                                                                                                                                | Introduction                                                                      |
| <b>METHODS</b><br>Participants             | 3           | Eligibility criteria for participants <i>and clusters</i> and the settings and locations where the data were collected                                                                                                                                                                                                                                       | Methods: Site and population; Design; Fig. 1                                      |
| Interventions                              | 4           | Precise details of the interventions intended for each group, <i>whether they pertain to the individual level, the cluster level, or both</i> , and how and when they were actually administered.                                                                                                                                                            | Methods: Implementation of the intervention; Fig. S1                              |
| Objectives                                 | 5           | Specific objectives and hypotheses <i>and whether they pertain to the individual level, the cluster level, or both.</i>                                                                                                                                                                                                                                      | Introduction                                                                      |
| Outcomes                                   | 6           | Report clearly defined primary and secondary outcome measures, <i>whether they pertain to the individual level, the cluster level, or both</i> , and, when applicable, any methods used to enhance the quality of measurements (eg multiple observations, training of assessors)                                                                             | Methods: Outcome, Data collection and field staff                                 |
| Sample size                                | 7           | How <i>total</i> sample size was determined ( <i>including method of calculation, number of clusters, cluster size, a coefficient of intracluster correlation (ICC or <math>k</math>), and an indication of its uncertainty</i> ) and, when applicable, explanation of any interim analyses and stopping rules.                                              | Methods: Design                                                                   |
| Randomization --<br>Sequence generation    | 8           | Method used to generate the random allocation sequence, including details of any restriction (eg blocking, stratification, <i>matching</i> ) Allocation.                                                                                                                                                                                                     | Methods: Design                                                                   |
| Randomization --<br>Allocation concealment | 9           | Method used to implement the random allocation sequence, <i>specifying that allocation was based on clusters rather than individuals</i> and clarifying whether the sequence was concealed until interventions were assigned.                                                                                                                                | Methods: Design                                                                   |
| Randomization --<br>Implementation         | 10          | Who generated the allocation sequence, who enrolled participants, and who assigned participants to their groups.                                                                                                                                                                                                                                             | Methods: Design                                                                   |
| Blinding (masking)                         | 11          | Whether participants, those administering the interventions, and those assessing the outcomes were blinded to group assignment. If done, how the success of blinding was evaluated.                                                                                                                                                                          | Methods: Design; Discussion                                                       |
| Statistical methods                        | 12          | Statistical methods used to compare groups for primary outcome(s) <i>indicating how clustering was taken into account</i> , methods for additional analyses, such as subgroup analyses and adjusted analyses.                                                                                                                                                | Methods: Statistical analysis                                                     |
| <b>RESULTS</b><br>Participant flow         | 13          | Flow of <i>clusters and</i> individual participants through each stage. Specifically, for each group report the numbers of <i>clusters and</i> participants randomly assigned, receiving intended treatment, completing the study protocol, and analysed for the primary outcome. Describe protocol deviations from study as planned, together with reasons. | Results: Participant flow and recruitment; Fig. 1                                 |
| Recruitment                                | 14          | Dates defining the periods of recruitment and follow up.                                                                                                                                                                                                                                                                                                     | Results: Participant flow and recruitment; Figs. 1, S1                            |
| Baseline data                              | 15          | Baseline information for each group <i>for the individual and cluster levels as applicable.</i>                                                                                                                                                                                                                                                              | Methods: Baseline characteristics; Table 2                                        |
| Numbers analyzed                           | 16          | Number of <i>clusters and</i> participants (denominator) in each group included in each analysis and whether the analysis was by intention to treat.                                                                                                                                                                                                         | Methods: Statistical analysis; Fig. 1; Table 3                                    |
| Outcomes and estimation                    | 17          | For each primary and secondary outcome, a summary of results for each group <i>for the individual or cluster level as applicable</i> , and the estimated effect size and its precision (eg 95% confidence interval) <i>and a coefficient of intracluster correlation (ICC or <math>k</math>) for each primary outcome.</i>                                   | Results: Diarrhoeal illness in the control and intervention arm; Table 3          |
| Ancillary analyses                         | 18          | Address multiplicity by reporting any other analyses performed, including subgroup analyses and adjusted analyses, indicating those prespecified and those exploratory.                                                                                                                                                                                      | Methods: Statistical analysis; Results: Diarrhoeal illness by compliance; Table 3 |
| Adverse events                             | 19          | All important adverse events or side effects in each intervention group.                                                                                                                                                                                                                                                                                     | na                                                                                |
| <b>DISCUSSION</b><br>Interpretation        | 20          | Interpretation of the results, taking into account study hypotheses, sources of potential bias or imprecision and the dangers associated with multiplicity of analyses and outcomes.                                                                                                                                                                         | Discussion                                                                        |
| Generalizability                           | 21          | Generalisability (external validity) <i>to individuals and/or clusters (as relevant)</i> of the trial findings.                                                                                                                                                                                                                                              | Discussion                                                                        |
| Overall evidence                           | 22          | General interpretation of the results in the context of current evidence.                                                                                                                                                                                                                                                                                    | Discussion                                                                        |
